# Supplementary material
Source: PubMed Central journal article supplement (PMC6355155)
Supplement: NIHMS1000385-supplement-SI.pdf [file NIHMS1000385-supplement-SI.pdf]

# ADVANCED HEALTHCARE MATERIALS

## Supporting Information

for *Adv. Healthcare Mater.*, DOI: 10.1002/adhm.201800441

3D-Plotted Beta-Tricalcium Phosphate Scaffolds with Smaller Pore Sizes Improve In Vivo Bone Regeneration and Biomechanical Properties in a Critical-Sized Calvarial Defect Rat Model

*Jingjing Diao, Jun OuYang, Ting Deng, Xiao Liu, Yanting Feng, Naru Zhao,\* Chuanbin Mao,\* and Yingjun Wang\**

## Supporting Information

**3D-Plotted beta-Tricalcium Phosphate Scaffolds with Smaller Pore Sizes Improve in Vivo Bone Regeneration and Biomechanical Properties in a Critical-Sized Calvarial Defect Rat Model**

*Jingjing Diao, Jun OuYang, Ting Deng, Xiao Liu, Yanting Feng, Naru Zhao<sup>\*</sup>, Chuanbin Mao<sup>\*</sup>, Yingjun Wang<sup>\*</sup>*

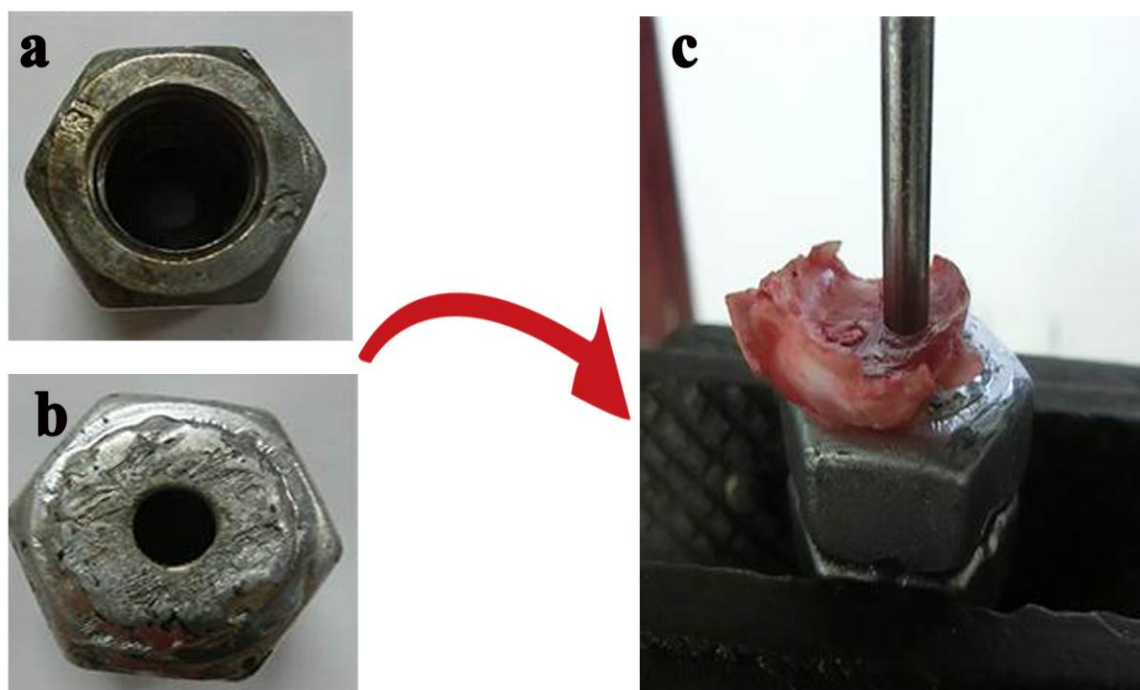

Figure S1. Schematic illustration of the custom- designed testing device and biomechanical testing process of the implants after the defects were implanted with scaffolds of different pore sizes (100  $\mu\text{m}$ , 250  $\mu\text{m}$ , 400  $\mu\text{m}$ ) and autogenous bone for 4, 8, and 12 weeks. a) A universal nut (M5 model). b) The nut in (a) welded by a custom-made sheet-metal (a hole with 5 mm in diameter). c) Biomechanical testing process.
